# Supplementary material for: Residues remote from the binding pocket control the antagonist selectivity towards the corticotropin-releasing factor receptor-1
Source: PubMed Central journal article supplement — Sci Rep. 2015 Jan 28;5:8066. doi: 10.1038/srep08066 (PMC4308710; doi:10.1038/srep08066), 2015-01-28
Supplement: srep08066-s1.pdf [file srep08066-s1.pdf]

## COMPUTATIONAL BIOLOGY AND BIOINFORMATICS

### DRUG DESIGN

# **Residues remote from the binding pocket control the antagonist selectivity towards the corticotropin-releasing factor receptor-1**

Xianqiang Sun<sup>†</sup>, Jianxin Cheng <sup>‡</sup>, Xu Wang<sup>†</sup>, Yun Tang<sup>‡\*</sup>, Hans Ågren<sup>†</sup>, Yaoquan Tu<sup>†\*</sup>

<sup>†</sup>Division of Theoretical Chemistry and Biology, School of Biotechnology, KTH Royal Institute of Technology, S-106 91 Stockholm, Sweden

<sup>‡</sup>Shanghai Key Laboratory of New Drug Design, School of Pharmacy, East China University of Science and Technology, Shanghai 200237, China

\*Correspondence to [tu@theochem.kth.se](mailto:tu@theochem.kth.se) and [ytang234@ecust.edu.cn](mailto:ytang234@ecust.edu.cn)

Table S1. The most conserved residues on the helices of CRF<sub>1</sub>R and CRF<sub>2</sub>R.

|     | Conserved residues in CRF <sub>1</sub> R | Conserved residues in CRF <sub>2</sub> R |
|-----|------------------------------------------|------------------------------------------|
| TM1 | S130 <sup>1.50</sup>                     | S127 <sup>1.50</sup>                     |
| TM2 | H184 <sup>2.50</sup>                     | H152 <sup>2.50</sup>                     |
| TM3 | E238 <sup>3.50</sup>                     | E205 <sup>3.50</sup>                     |
| TM4 | W265 <sup>4.50</sup>                     | W232 <sup>4.50</sup>                     |
| TM5 | N312 <sup>5.50</sup>                     | N279 <sup>5.50</sup>                     |
| TM6 | K343 <sup>6.50</sup>                     | K310 <sup>6.50</sup>                     |
| TM7 | G385 <sup>7.50</sup>                     | G352 <sup>7.50</sup>                     |

The superscript of a residue represents the Wootten numbering

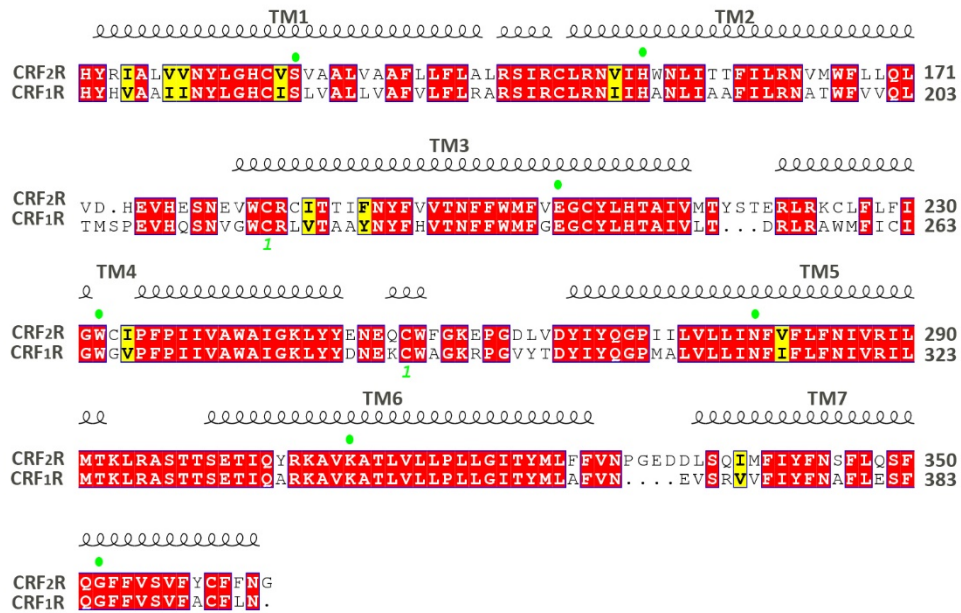

Figure S1. Sequence alignment of CRF<sub>1</sub>R with CRF<sub>2</sub>R. The identical residues are shown in the red background. The ICL1 of CRF1R is not included. The most conserved residues in each TM are labeled with green dots.

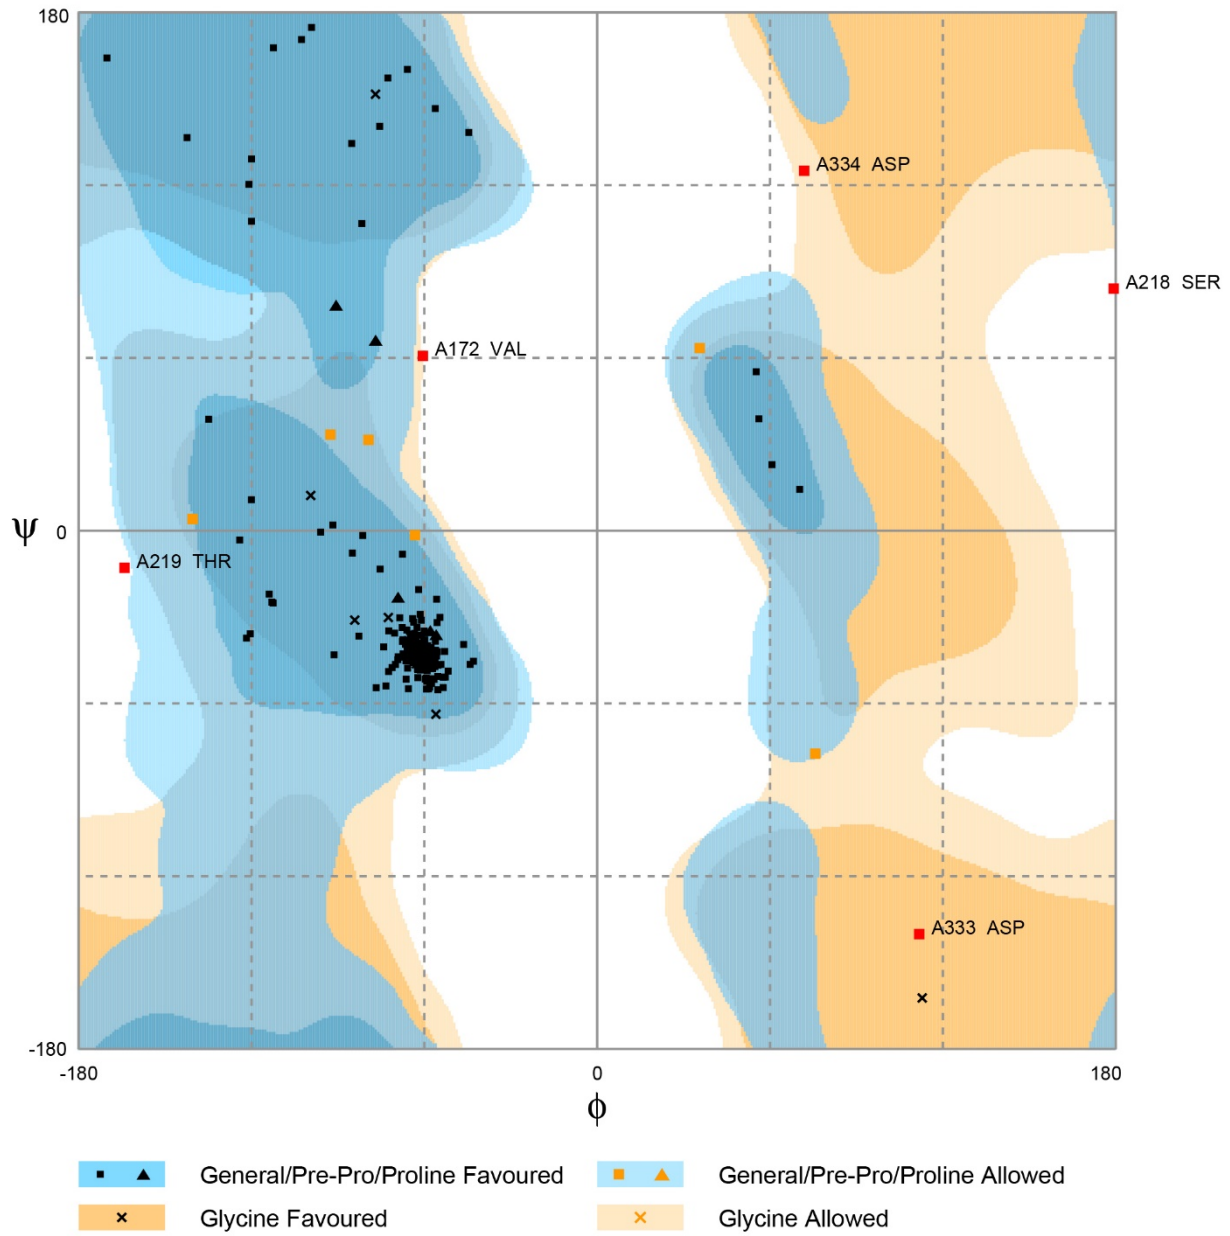

|                                                         |               |
|---------------------------------------------------------|---------------|
| Number of residues in favoured region (~98.0% expected) | : 240 (95.6%) |
| Number of residues in allowed region (~2.0% expected)   | : 6 (2.4%)    |
| Number of residues in outlier region                    | : 5 (2.0%)    |

Figure S2. Richardson plot of the modelled structure of CRF<sub>2</sub>R.

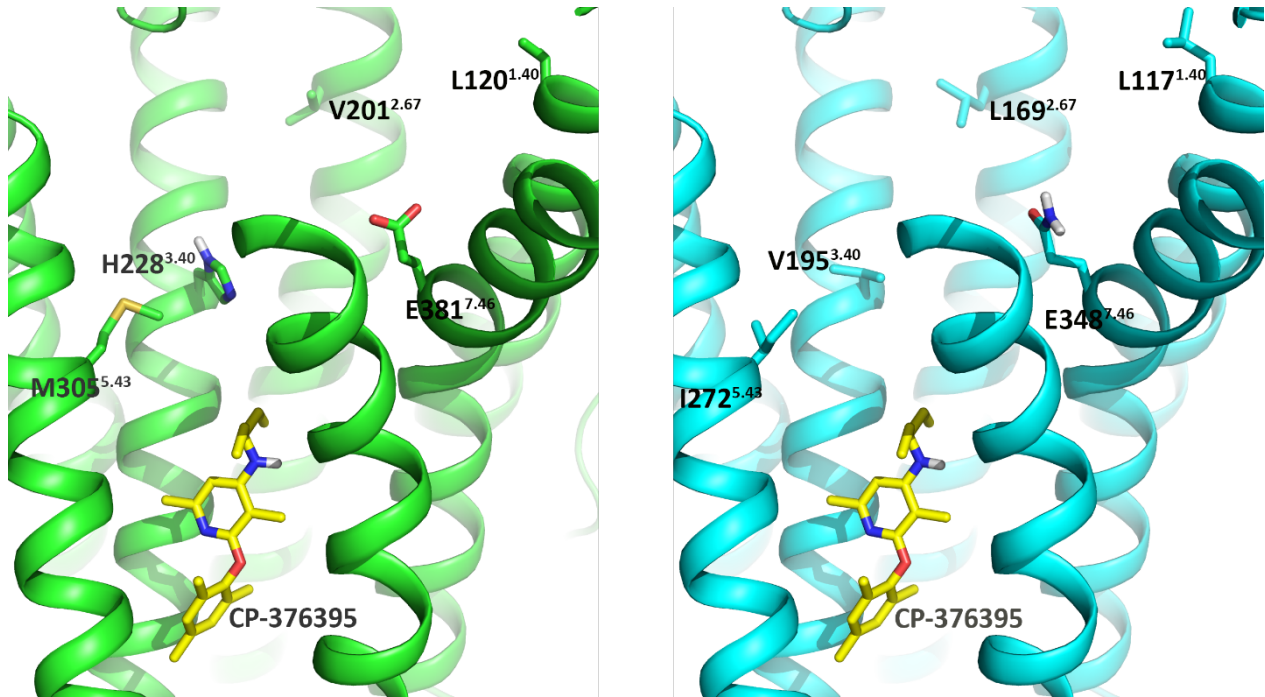

Figure S3. Comparison of the residues in CRF<sub>1</sub>R and CRF<sub>2</sub>R along the binding pathway of CP-376395. Protein structures are shown in the cartoon mode with the non-conserved residues and the antagonist shown as sticks. The structures of CRF<sub>1</sub>R and CRF<sub>2</sub>R are colored in green and cyan respectively. The antagonist CP-376395 is colored in yellow.

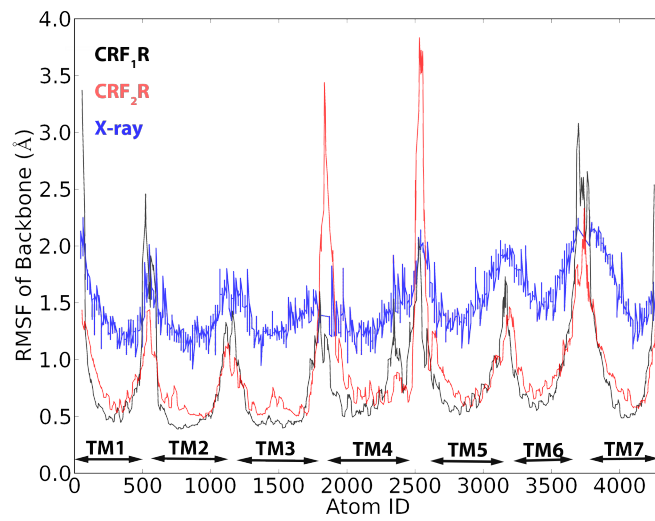

Figure S4. RMSFs of CRF<sub>1</sub>R and CRF<sub>2</sub>R from the unbiased MD simulations. The RMSF values calculated from the B-factors of the x-ray crystallography structure of CRF<sub>1</sub>R are also shown.

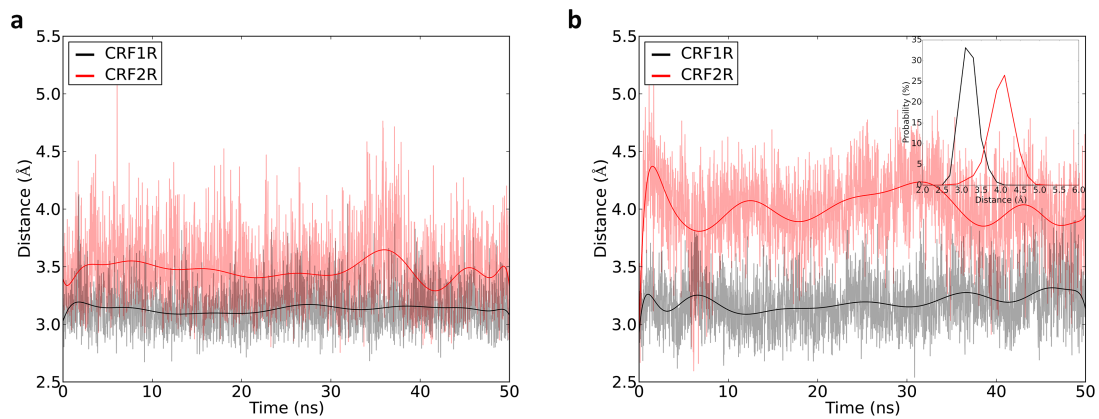

Figure S5. (a) Evolution of the distance between the side chain oxygen atom of Ser<sup>1.50</sup> and the backbone nitrogen atom of Phe<sup>7.51</sup> in the unbiased MD simulations; (b) Evolution of the distance between the side chain oxygen atom of Ser<sup>1.50</sup> and the backbone oxygen atom of Ser<sup>7.47</sup> in the unbiased MD simulations. The probability distributions of the distance are shown in the up right panel.

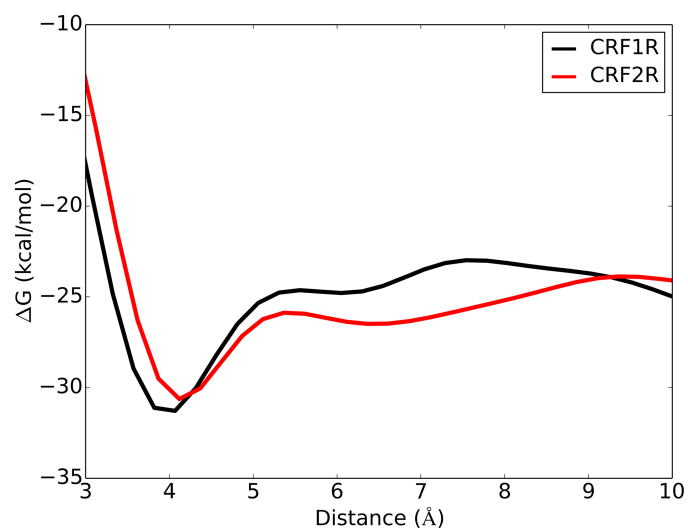

Figure S6. Evolution of the free energy profiles of the two systems with the distance between N $^{\delta}$  of His<sup>2.50</sup> and C $^{\delta}$  of Glu<sup>3.50</sup> as the collective variable. Both receptors prefer to stay in the state with the ionic lock formed.



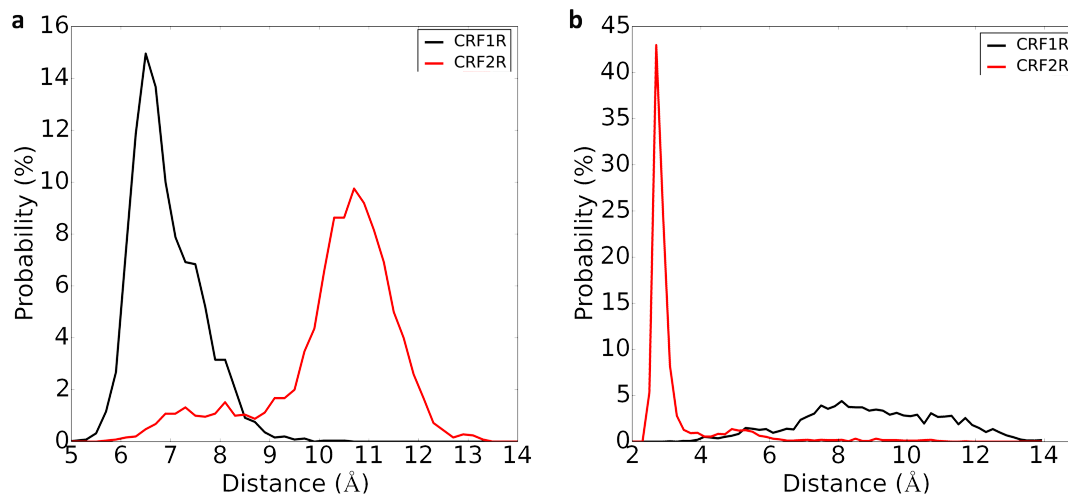

Figure S7. (a) The probability distribution of the distances between the backbone carbon atoms on Tyr<sup>6.63</sup> and on His228<sup>3.40</sup> in CRF<sub>1</sub>R and that between the backbone carbon atom on Tyr<sup>6.63</sup> and on Val228<sup>3.40</sup> in CRF<sub>2</sub>R; (b) The probability distributions of the distances between the side chain oxygen atoms on Tyr<sup>6.63</sup> and on Gln<sup>5.50</sup> in the two receptors.

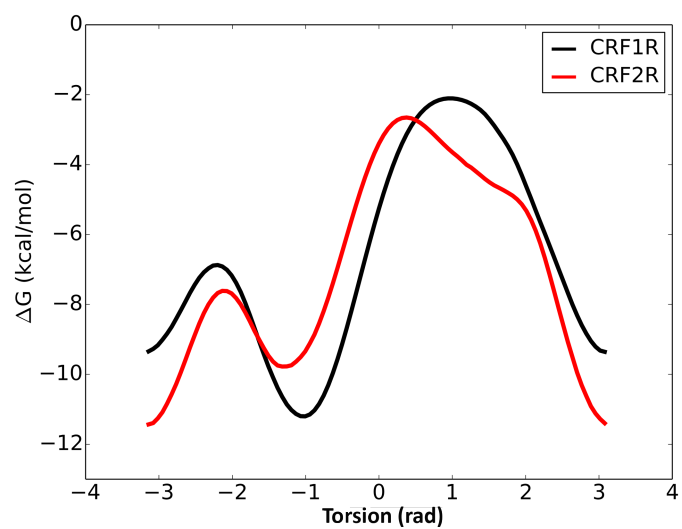

Figure S8. Free energy profiles of the systems with respect to the torsional angle  $\chi_1$  of Tyr<sup>6.63</sup> in CRF<sub>1</sub>R and in CRF<sub>2</sub>R. The torsional angle  $\chi_1$  of Tyr356<sup>6.63</sup> in CRF<sub>1</sub>R prefers to stay around -1 and the torsional angle  $\chi_1$  of Tyr323<sup>6.63</sup> in CRF<sub>2</sub>R prefers to stay around  $-\pi$  or  $\pi$ .

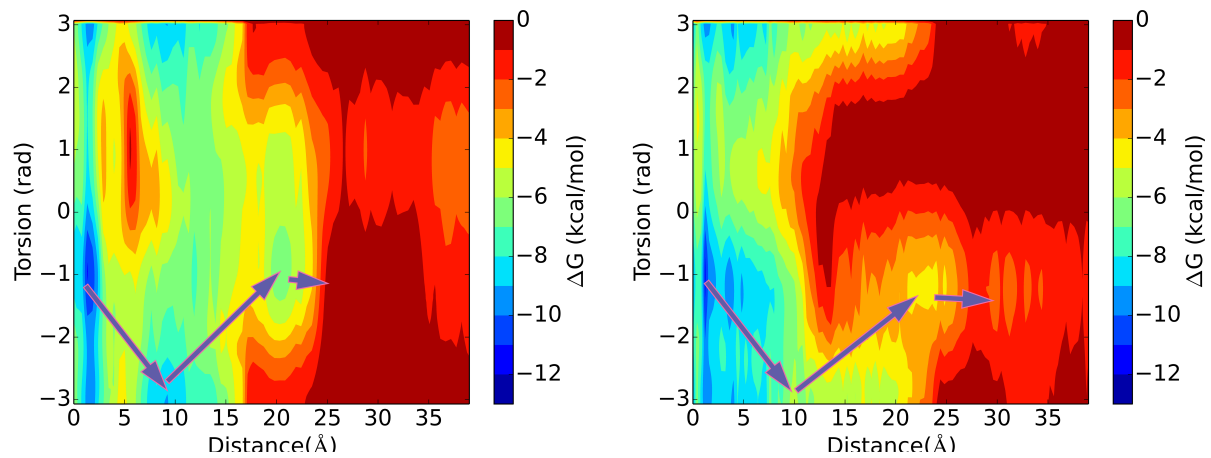

Figure S9. The binding free energy surfaces for the dissociation of CP-376395 from CRF<sub>1</sub>R.

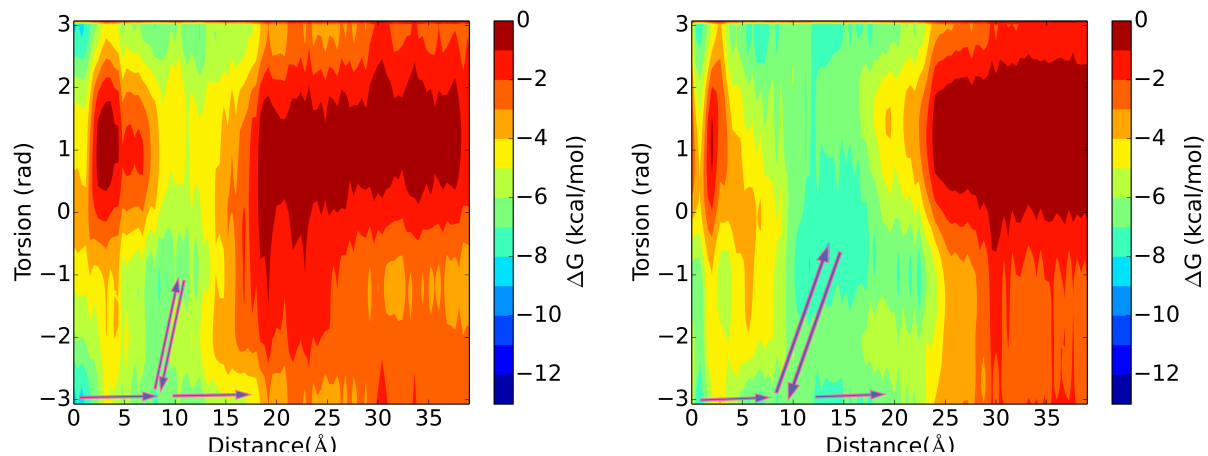

Figure S10. The free energy surfaces for the dissociation of CP-376395 from CRF<sub>2</sub>R.
